# Supplementary material
Source: PubMed Central journal article supplement (PMC8049101)
Supplement: NIHMS1673613-supplement-2.pdf [file NIHMS1673613-supplement-2.pdf]

## **SUPPLEMENTARY INFORMATION GUIDE**

**Supplementary Table 1** - Relevant clinical information for the eight TNBC tumors and four TNBC cell lines that were analyzed in this study.

**Supplementary Table 2** – Exome sequencing mutational information from bulk DNA exome of the 8 TNBC tumors.

**Supplementary Table 3** - List of dual barcodes from ACT protocol.

**Supplementary Methods** – Extensive description of the methodology used for the mathematical modeling section.
